# Supplementary material for: Determining the effectiveness of a video-based contact intervention in improving attitudes of Penang primary care nurses towards people with mental illness
Source: PubMed Central journal article supplement (PMC5683645; doi:10.1371/journal.pone.0187861), 2017-11-13
Supplement: pone.0187861.s001.pdf [file pone.0187861.s001.pdf]

## Supporting Information

**S1 Table. Univariate analysis (t test) of independent variables associated with OMS-HC-15-M mean total scores at baseline.**

| Variable                                           |       | Mean score<br>(95% CI) | t value    | p value        |
|----------------------------------------------------|-------|------------------------|------------|----------------|
| Total scale                                        |       | 40 (39 – 40)           | -          | -              |
| Aged 40 and below                                  | Yes   | 39 (39 – 40)           | 1.1        | 0.278          |
|                                                    | No    | 41 (39 - 43)           |            |                |
| Gender                                             | Man   | 38 (19 – 56)           | -0.57      | 0.568          |
|                                                    | Woman | 40 (39 – 40)           |            |                |
| Married                                            | No    | 40 (38 – 42)           | 0.32       | 0.746          |
|                                                    | Yes   | 40 (39 – 40)           |            |                |
| Had past contact with PWMI                         | No    | 41 (38 -44)            | 1.1        | 0.269          |
|                                                    | Yes   | 39 (39 – 40)           |            |                |
| Had past contact with family/close friends with MI | No    | 40 (39 – 41)           | 0.81       | 0.419          |
|                                                    | Yes   | 38 (36 – 41)           |            |                |
| Had past contact with acquaintances with MI        | No    | 40 (39 – 41)           | 0.89       | 0.376          |
|                                                    | Yes   | 38 (35 – 41)           |            |                |
| Had past contact with patients with MI             | No    | 41 (39 – 43)           | <b>2.5</b> | <b>0.013**</b> |
|                                                    | Yes   | 39 (38 – 40)           |            |                |
| Had past contact with PWMI outside workplace       | No    | 39 (37 – 40)           | -1.6       | 0.117          |
|                                                    | Yes   | 40 (39 – 41)           |            |                |
| Received previous training                         | No    | 40 (39 – 41)           | <b>2.5</b> | <b>0.014*</b>  |
|                                                    | Yes   | 38 (37 – 39)           |            |                |
| Desire to be trained                               | No    | 42 (40 – 45)           | 2.3        | <b>0.030**</b> |
|                                                    | Yes   | 39 (38 – 40)           |            |                |

OMS-HC-15-M = Opening Minds Scale for Healthcare Providers – 15 items Malay version,

PWMI = people with mental illness, MI = mental illness, CI = Confidence Interval

\* $p < 0.05$ ; \*\*using t test with unequal variances
