# Supplementary material for: Determining the effectiveness of a video-based contact intervention in improving attitudes of Penang primary care nurses towards people with mental illness
Source: PubMed Central journal article supplement (PMC5683645; doi:10.1371/journal.pone.0187861), 2017-11-13
Supplement: pone.0187861.s002.pdf [file pone.0187861.s002.pdf]

**S2 Table. Univariate analysis (one-way ANOVA) of independent variables associated with OMS-HC-15-M mean total scores at baseline.**

|                                      | Variable        | Mean score<br>(95% CI) | F<br>value | <i>p</i><br>value | Bonferroni t (95%<br>CI) <sup>†</sup> | <i>p</i><br>value | adjusted <i>p</i><br>value |
|--------------------------------------|-----------------|------------------------|------------|-------------------|---------------------------------------|-------------------|----------------------------|
| Ethnicity                            | Malay           | 40 (39 – 41)           | 4.4        | <b>0.014*</b>     | -1.5 (-11 - 2.5)                      | 0.38              | 0.096                      |
|                                      | Chinese         | 36 (34 – 37)           |            |                   | -2.6 (-8.7 - -0.29)                   |                   |                            |
|                                      | Indian          | 35 (31 – 39)           |            |                   | -0.04 (-8.1 - 7.8)                    |                   |                            |
| Religion                             | Islam           | 40 (39 – 41)           | 2.6        | 0.053             | -                                     | -                 | -                          |
|                                      | Buddhism        | 36 (35 – 38)           |            |                   |                                       |                   |                            |
|                                      | Hinduism        | 35 (30 – 40)           |            |                   |                                       |                   |                            |
|                                      | Christianity    | 38 (29 – 46)           |            |                   |                                       |                   |                            |
| Highest under-graduate qualification | Certificate     | 39 (38 – 41)           | 0.31       | 0.735             | -                                     | -                 | -                          |
|                                      | Diploma         | 40 (39 – 41)           |            |                   |                                       |                   |                            |
|                                      | Degree          | 38 (34 – 42)           |            |                   |                                       |                   |                            |
| Rank                                 | Community nurse | 40 (39 – 41)           | 0.61       | 0.611             | -                                     | -                 | -                          |
|                                      | Staff nurse     | 40 (38 – 41)           |            |                   |                                       |                   |                            |
|                                      | Head nurse      | 40 (37 – 43)           |            |                   |                                       |                   |                            |
|                                      | Matron          | 37 (32 – 41)           |            |                   |                                       |                   |                            |
|                                      |                 |                        |            |                   |                                       |                   |                            |
| Nature of encounter with PWMI        | Pleasant        | 38 (36 – 39)           | 6.0        | <b>0.003*</b>     | -1.17 (-5.8 - 2.0)                    | 0.74              | <b>0.009**</b>             |
|                                      | Unpleasant      | 40 (36- 43)            |            |                   | 3.38 (0.83 - 5.0)                     |                   |                            |
|                                      | Neutral         | 41 (40 – 42)           |            |                   | 0.64 (-2.9 - 4.9)                     |                   |                            |
| Frequency of encounter with PWMI     | Daily           | 40 (37 – 43)           | 1.6        | 0.167             | -                                     | -                 | -                          |
|                                      | Once a week     | 38 (36 – 41)           |            |                   |                                       |                   |                            |
|                                      | Once a month    | 37 (36 – 39)           |            |                   |                                       |                   |                            |
|                                      |                 | 40 (39 – 41)           |            |                   |                                       |                   |                            |
|                                      | Rarely          |                        |            |                   |                                       |                   |                            |

CI = confidence interval, PWMI = people with mental illness,

\**p*<0.05; \*\*adjusted *p*<0.017 for pair comparison test,

<sup>†</sup>Bonferroni testing carried out only on those with significance values *p*<0.05
